# Supplementary material
Source: PubMed Central journal article supplement (PMC7081246)
Supplement: Supp_Table1.pdf [file Supp_Table1.pdf]

**Table S1: List of viruses and their hamster viscerotropic phenotypes including, mortality, histopathologic changes, and viremia.**

| Strain      | Mortality (%) | Viremia day 3 pi<br>(log <sub>10</sub> TCID <sub>50</sub> /mL) | Histopathologic<br>changes | Reference                                                |
|-------------|---------------|----------------------------------------------------------------|----------------------------|----------------------------------------------------------|
| Jimenez P0  | 0             | 6.5±1.3                                                        | unknown                    | Tesh <i>et al.</i> , 2001 &<br>Xiao <i>et al.</i> , 2001 |
| Jimenez P10 | 20-80*        | 7.6±0.8                                                        | severe                     | Tesh <i>et al.</i> , 2001 &<br>Xiao <i>et al.</i> , 2001 |
| Asibi P0    | 0             | 4.5±0.5                                                        | mild                       | McArthur <i>et al.</i> , 2003                            |
| Asibi P7    | 100           | 8±0.5                                                          | severe                     | McArthur <i>et al.</i> , 2003                            |

\* Age dependent
