# Supplementary material
Source: PubMed Central journal article supplement (PMC7081246)
Supplement: Supp_Table2.pdf [file Supp_Table2.pdf]

**Table S2. List of primers used to amplify the genome of South American YFV.**

| Primer name | Orientation | Genomic position | Sequence (5' - 3')            |
|-------------|-------------|------------------|-------------------------------|
| B5          | sense       | 1                | AGTAAATCCTGTGTGCTAATTGAGG     |
| YF300       | anti-sense  | 678              | TAGCACCAGCAATCAATGTCATCTGGC   |
| Lee1        | sense       | 43               | CGAGTTGCTAGGCAATAAACACATTTGGA |
| YF7         | anti-sense  | 1312             | TATTTGGGAAAGGGAGCATT          |
| AJ7up       | sense       | 1223             | GAAGAGAACGAAGGGGACAATGC       |
| YF100       | anti-sense  | 2554             | GTATGAGTACTTGTTCAGCCAGTC      |
| YF2400      | sense       | 2400             | GAGCATGATCCTAGTTGGAGT         |
| YF3600      | anti-sense  | 3600             | GCACCATGCCTCCGAC              |
| YF3420      | sense       | 3420             | GGCTTTCACGGGAGTGATGGTTGC      |
| YF5300      | anti-sense  | 5300             | TCAAGGTAGCATGACACATAGCGTCAATG |
| NS3c        | sense       | 5174             | GCTGGGAAGACAAGACGTTTCC        |
| NS3d        | anti-sense  | 5896             | GCTTAAAAGCCGTCCTGCAATC        |
| YF5700      | sense       | 5700             | CTGCAAATGTCATGG               |
| YF6400      | anti-sense  | 6400             | GACCAGCATCTCCAGCAG            |
| NS4a1       | sense       | 6338             | GGAGGAGCAAAGAAGCCTCTGC        |
| NS5b        | anti-sense  | 8352             | AGGCGGGATGTTTGGTTCACAG        |
| FG1         | sense       | 8270             | TCAAGGAACTCCACACATGAGATGTACT  |
| YF9334      | anti-sense  | 9334             | GTAAGTCATTTCCATTACAGCCAGCG    |
| FU2         | sense       | 9233             | GCTGATGACACCGCCGGCTGGGACAC    |
| CFD3        | anti-sense  | 10077            | AGCATGTCTTCCGTGGTCATCCA       |
| EMF         | sense       | 10055            | TGGATGASACKGARGAYA            |
| VD8         | anti-sense  | 10640            | GGGTCTCCTCTAACCTCTA           |
| sNS5i       | sense       | 10167            | CCAAGAGACAAGACAAGCTGTG        |
| aNS5i       | anti-sense  | 10862            | AGTGGTTTTGTGTTTTGTTCATCCAAA   |
